# Supplementary material
Source: ML conference proceedings conference paper supplement (https://openaccess.thecvf.com/content/CVPR2022/html/Wu_Text-to-Image_Synthesis_Based_CVPR_2022_paper.html)
Supplement: Supplementary file 1 [file Wu_Text-to-Image_Synthesis_Based_CVPR_2022_supplemental.pdf]

# Text-to-Image Synthesis based on Object-Guided Joint-Decoding Transformer

Fuxiang Wu<sup>1,2</sup>, Liu Liu<sup>3</sup>, Fusheng Hao<sup>1,2</sup>, Fengxiang He<sup>4</sup>, Jun Cheng<sup>1,2\*</sup>

<sup>1</sup> Guangdong Provincial Key Laboratory of Robotics and Intelligent System,  
Shenzhen Institute of Advanced Technology, CAS, China.

<sup>2</sup> The Chinese University of Hong Kong, Hong Kong, China.

<sup>3</sup> The University of Sydney, Australia.

<sup>4</sup> JD.com, Beijing, China.

{fx.wu1, fs.hao, jun.cheng}@siat.ac.cn, liu.liu1@sydney.edu.au, hefengxiang@jd.com.

## 1. Additional Experiments

We report more experiments about the controllable generation of our joint transformer by gradually including more objects in Figure 1 and Figure 2. In addition, we include more generated examples in Figure 3 and report more examples by using disturbing object labels in Figure 4 and by varying the bounding box of the largest object in Figure 5.

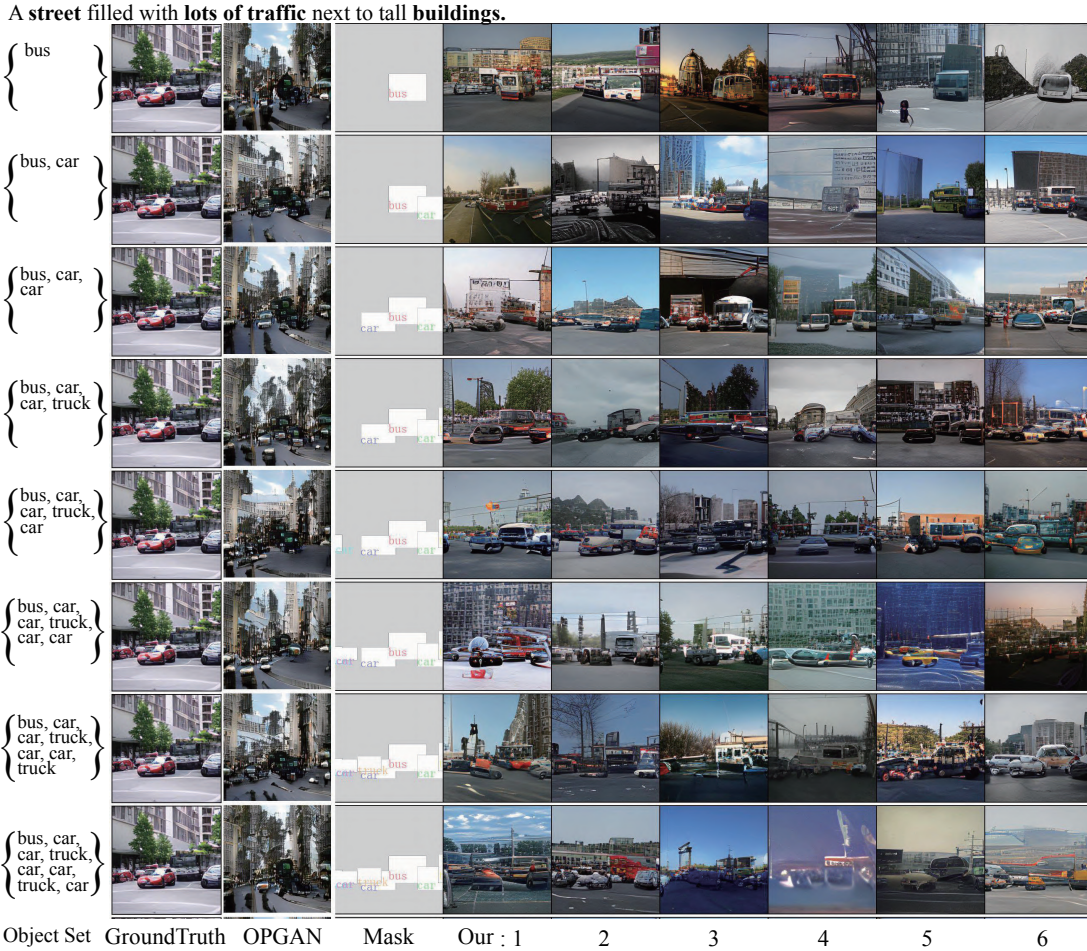

Figure 1. Generated examples with the variant objects depicted in the left brace: the caption is above the corresponding image and the prominent characteristics are marked as bold; “Mask” depicts the layout under the variant objects; “Our:1-6” are the synthesized samples.



A **woman** is riding her **bike** down the **street** in front of **traffic**.

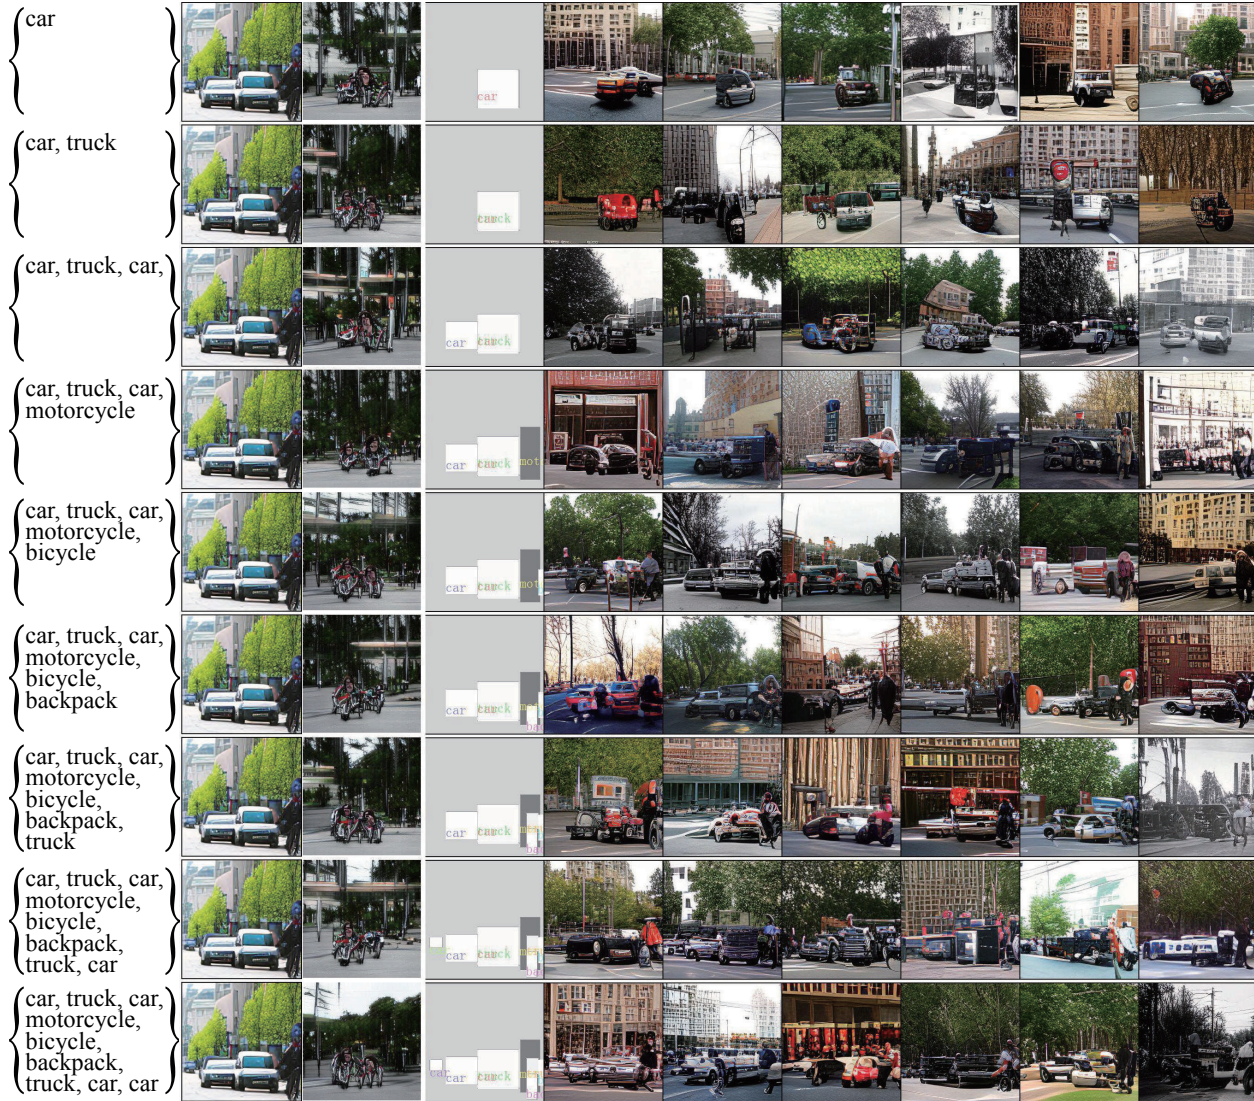

Object Set   GroundTruth   OPGAN   Mask   Our : 1   2   3   4   5   6

Figure 2. Generated examples with the variant objects depicted in the left brace: the textual description is above the corresponding image and the prominent textual characteristics are marked as bold; “Mask” depicts the layout under the variant objects; “Our:1-6” are the synthesized samples.

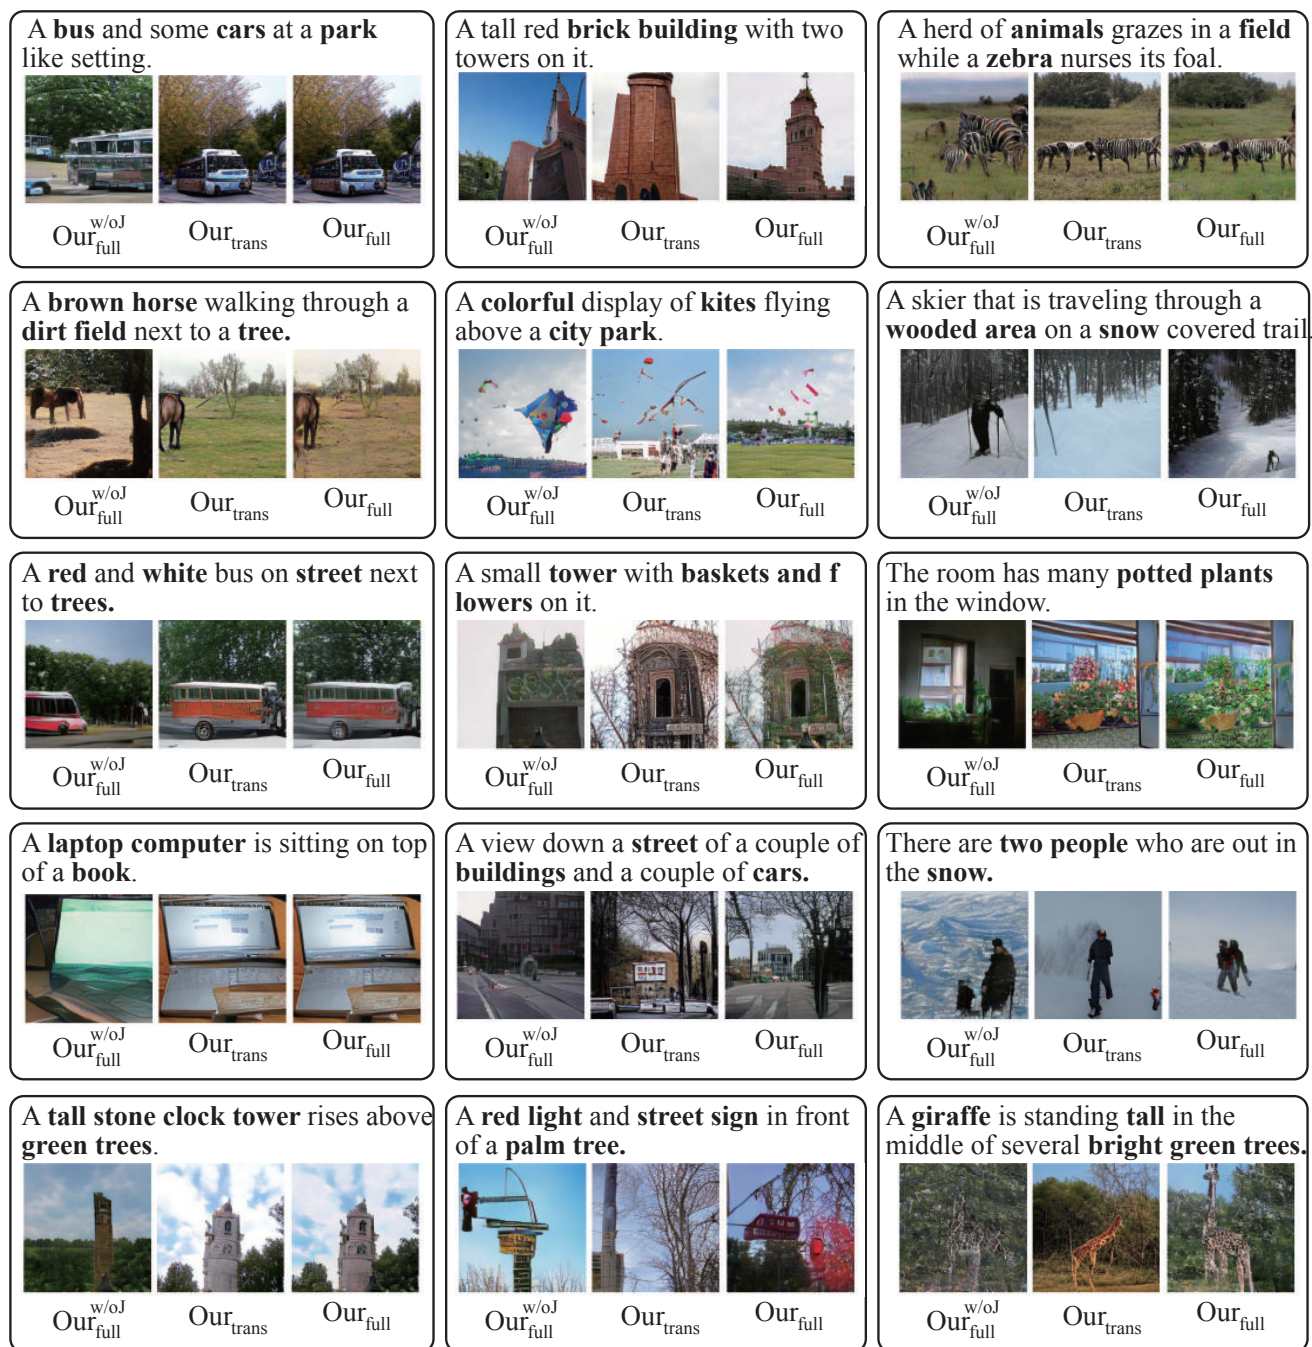

Figure 3. Generated examples: the textual description is above the corresponding image and the prominent textual characteristics are marked as bold.



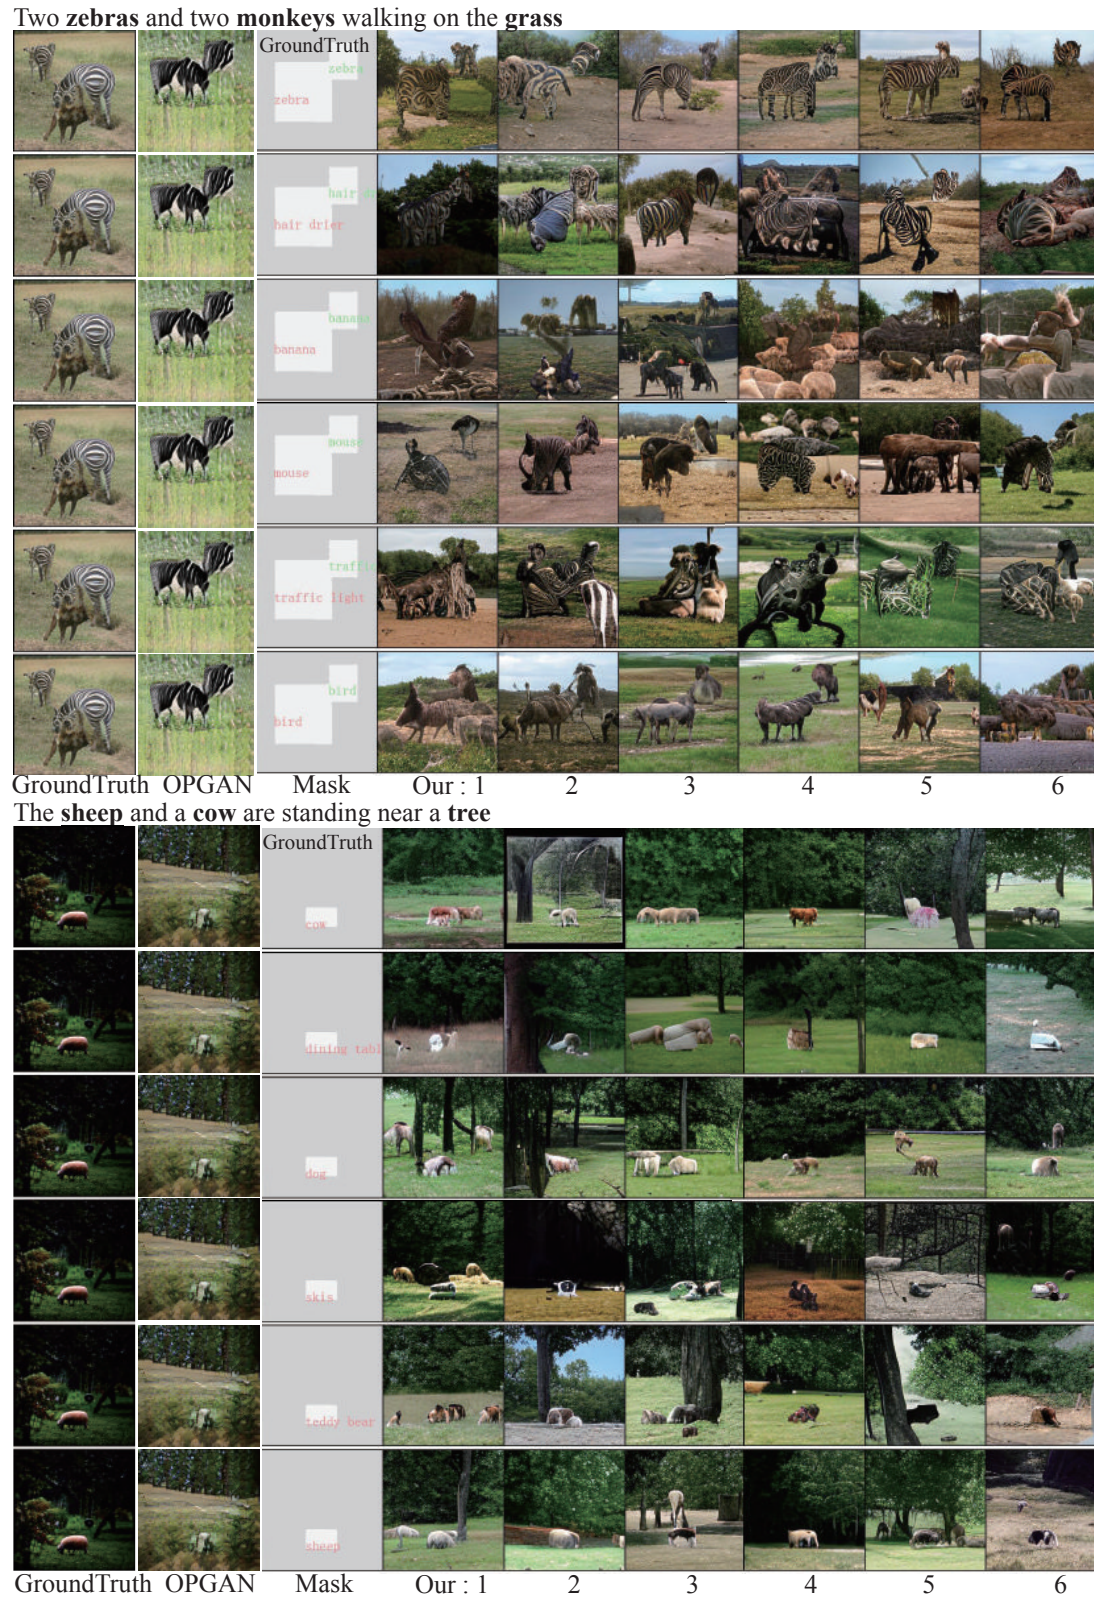

Figure 4. Generated examples with disturbing object labels: the textual description is above the corresponding image and the prominent textual characteristics are marked as bold; “Mask” depicts the layout under the disturbing object labels; “Our:1-6” are the synthesized samples.



A **stop sign** surrounded by overgrown bushes by a **railroad track**.

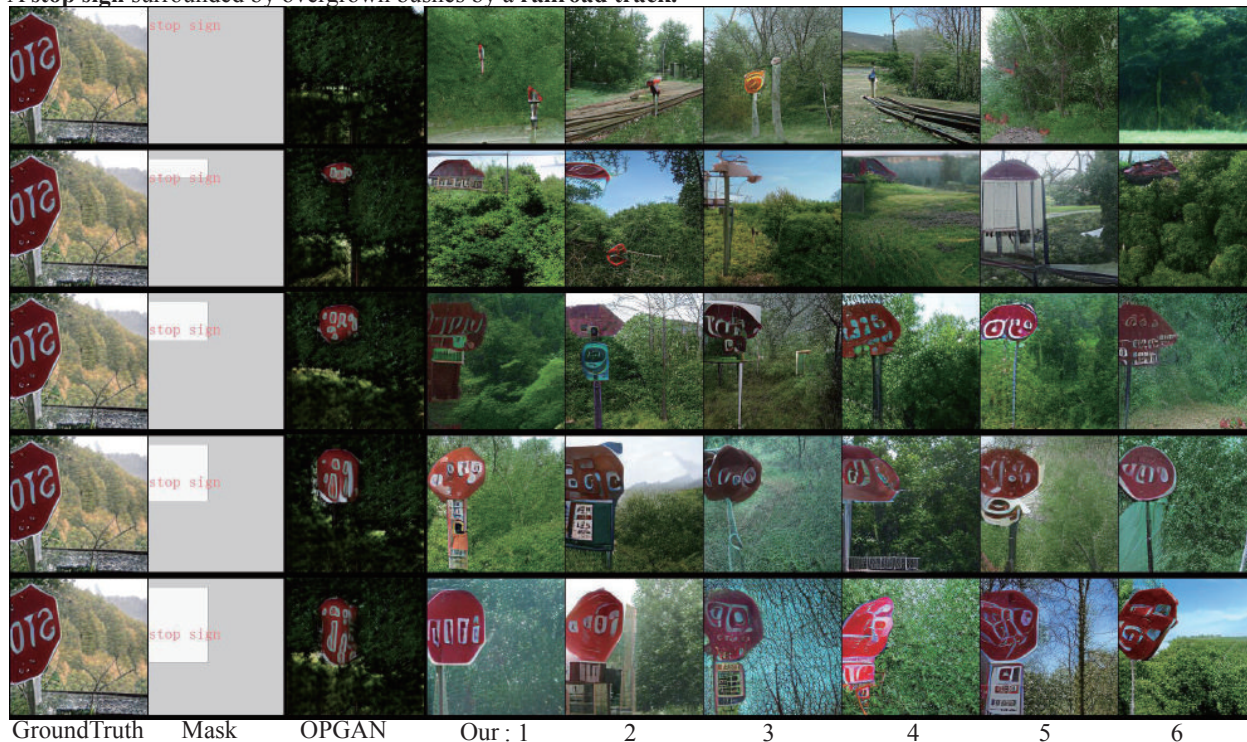

A **train engine** and **car** in a park display.

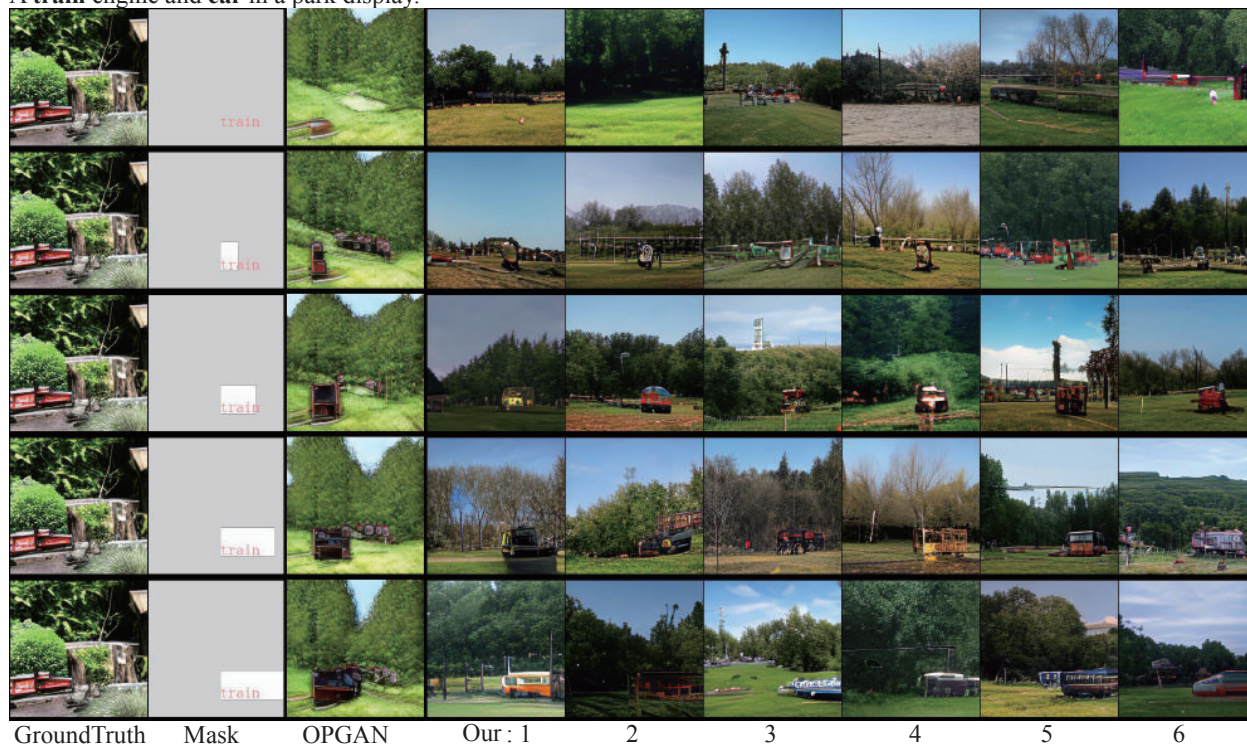

Figure 5. Generated examples with the largest object based on varied bounding boxes: the textual description is above the corresponding image and the prominent textual characteristics are marked as bold; “Mask” depicts the layout under the varied bounding boxes; “Our:1-6” are the synthesized samples.
